1 Comparing the risks of environmental carcinogenic chemicals in Japan  
2 using the loss of happy life expectancy indicator

3  
4 Michio Murakami <sup>a,\*</sup>, Kyoko Ono <sup>b</sup>, Yoshitake Takebayashi <sup>c</sup>, Masaharu Tsubokura <sup>d</sup>, Shuhei  
5 Nomura <sup>e,f,g</sup>

6  
7 <sup>a</sup> Center for Infectious Disease Education and Research, Osaka University, Osaka, Japan

8 <sup>b</sup> Research Institute of Science for Safety and Sustainability, National Institute of Advanced  
9 Industrial Science and Technology, Ibaraki, Japan

10 <sup>c</sup> Department of Health Risk Communication, Fukushima Medical University School of Medicine,  
11 Fukushima, Japan

12 <sup>d</sup> Department of Radiation Health Management, Fukushima Medical University School of Medicine,  
13 Fukushima, Japan

14 <sup>e</sup> Department of Health Policy and Management, School of Medicine, Keio University, Tokyo,  
15 Japan

16 <sup>f</sup> Department of Global Health Policy, Graduate School of Medicine, The University of Tokyo,  
17 Tokyo, Japan

18 <sup>g</sup> Tokyo Foundation for Policy Research, Tokyo, Japan

19 \* Corresponding author: [michio@cider.osaka-u.ac.jp](mailto:michio@cider.osaka-u.ac.jp)

21 **Abstract**

22 In this study, we aimed to use the loss of happy life expectancy (LHpLE), an indicator that enables  
23 risk assessment considering wellbeing, to compare the risks of environmental carcinogenic  
24 chemicals in Japan. First, we surveyed Japanese people to determine their emotional happiness by  
25 age and sex and evaluated whether cancer incidence reduced emotional happiness. Questionnaires  
26 were administered to a general population panel and a panel of patients with cancer in 2022,  
27 recruiting a predetermined number of responses of 5000 and 850, respectively. Second, using the  
28 survey data, LHpLE was calculated for radon, arsenic, and fine particulate matter (aerodynamic  
29 diameter  $<2.5 \mu\text{m}$ ;  $\text{PM}_{2.5}$ ) and compared to psychological distress, considering increased mortality  
30 and decreased emotional happiness due to these risks. We discovered no significant decrease in  
31 emotional happiness due to cancer incidence and no significant associations between emotional  
32 happiness and cancer type, history, or stage. LHpLE was calculated to be  $6.4 \times 10^{-3}$  years for radon,  
33  $2.6 \times 10^{-3}$  years for arsenic,  $1.1 \times 10^{-2}$  years (2012 exposure) and  $8.6 \times 10^{-4}$  years (2020 exposure)  
34 for  $\text{PM}_{2.5}$ , and  $9.7 \times 10^{-1}$  years for psychological distress. The fraction of losses caused by these  
35 carcinogenic chemicals to HpLE exceeded  $10^{-5}$ , suggesting that risk reduction for these chemicals  
36 is important in environmental policies. The LHpLE indicator allows for comparing different types  
37 of risks, such as environmental chemicals and psychological distress. This is the first study to  
38 compare chemical risks using the LHpLE indicator.

39

40 **Keywords**

41 Risk comparison, happy life expectancy, wellbeing, cancer risk, chemical safety

42

43

## 44 **1. Introduction**

45 Comparing risks is the foundation for rational decision-making. Risk comparisons are useful for  
46 individual decision-making through an understanding of risk magnitude and social decision-making,  
47 such as identifying public health priorities and evaluating risk trade-offs. Common indicators must  
48 be utilized to compare the different risks. Examples of risk indicators include mortality (Graunt,  
49 1662), cancer risk (Mantel and Bryan, 1961), loss of life expectancy (LLE; average shortened life  
50 expectancy) (Cohen and Lee, 1979), disability-adjusted life years (DALYs) (Murray et al., 1994),  
51 and quality-adjusted life years (Zeckhauser and Shepard, 1976). Comparing the risks of  
52 environmental chemicals (Gamo et al., 2003) and multinational comparisons of risk changes over  
53 time (GBD 2019 Risk Factors Collaborators, 2020) are typical examples of such practices. These  
54 risk comparisons can provide information for advancing effective policies and evaluating their  
55 effectiveness.

56 Recently, the importance of considering improvements in wellbeing in environmental policies has  
57 been highlighted (Bok, 2010), and evaluations based on wellbeing have been conducted (Fisher et  
58 al., 2021; Sanderson et al., 2013). Developing a risk-comparison indicator that considers wellbeing  
59 has also been proposed (Johnson et al., 2016). Murakami et al. (2018) combined life tables and  
60 subjective emotional happiness based on “yes/no” responses to a questionnaire to determine happy

61 life expectancy (HpLE) and proposed a novel risk indicator for the loss of HpLE (LHpLE) as the  
62 average shortened HpLE time. In their study, HpLE was defined as the lifespan during which a  
63 person experiences subjective emotional wellbeing. LHpLE can be evaluated by considering  
64 mortality and changes in emotional happiness due to risk exposures. As an extended concept of LLE,  
65 DALYs, and quality-adjusted life years, LHpLE can be used in various fields, including  
66 environmental science, medicine, and economics. LHpLE has several advantages: it is based on a  
67 ratio scale; it can be treated arithmetically; it does not require the evaluation of weights related to  
68 the trade-off between disability and death; and it can evaluate qualities other than disability. We  
69 have compared the psychological distress and cancer risk associated with radiation exposure after  
70 the Fukushima Daiichi Nuclear Power Station accident (Murakami et al., 2018), the benefits of  
71 returning to one's hometown after the accident, cancer risks associated with radiation exposure  
72 (Murakami et al., 2021), comfort benefits from air conditioning use, and increased risk of heat  
73 stroke and flooding associated with climate change (Arai et al., 2020). However, the LHpLE  
74 indicator has not been applied to environmental chemicals. Furthermore, changes in emotional  
75 happiness due to cancer have not been adequately investigated. Examining whether cancer  
76 incidence reduces emotional happiness, applying LHpLE to environmental carcinogenic chemicals,  
77 and comparing these to other medical risks can provide a basis for environmental policy  
78 prioritization and policy evaluation based on risk reduction over time.

79 Therefore, we aimed to use the LHpLE, an indicator that enables risk assessment considering  
80 wellbeing, to compare the risks of environmental carcinogenic chemicals in Japan. First, we

81 conducted a questionnaire survey of Japanese people to determine their emotional happiness by age  
82 and sex and evaluate whether cancer reduces emotional happiness. Second, LHpLE was calculated  
83 for radon, arsenic, and fine particulate matter (aerodynamic diameter  $<2.5 \mu\text{m}$ ;  $\text{PM}_{2.5}$ ), which are  
84 typical environmental carcinogenic chemicals in Japan, and compared their risk with psychological  
85 distress risk, which decreases emotional happiness. We chose psychological distress as a public  
86 health risk because it differs from these carcinogens. A large increase in using the LHpLE indicator  
87 for psychological distress was observed after the Fukushima Daiichi Nuclear Power Station  
88 accident (Murakami et al., 2018); however, psychological distress risk during normal times is  
89 unknown. This is the first study to compare chemical risks using the LHpLE indicator.

90

## 91 **2. Methods**

### 92 *2.1. Ethics*

93 The study was approved by the Research Ethics Committee of the Graduate School of Medicine,  
94 The University of Tokyo (authorization number 2021318NI-(1)). The participants' consent was  
95 obtained for questionnaire surveys.

96

### 97 *2.2. Questionnaire surveys*

98 Two online surveys were conducted, one each for the general and disease panels with patients with  
99 a cancer history in Japan. These panels were managed by Cross Marketing Inc., along with the  
100 health history registration information. Cross Marketing is a large research company with

101 approximately 3 million active panel monitors who responded to surveys within the last year (as of  
102 January 2022). Respondents were incentivized with points that could be converted into products or  
103 services.

104 Our first survey was conducted between July 12 and 13, 2022, with the general panel of monitors  
105 aged 20–69 until a pre-designed target collection number of 5,000 was achieved. The target  
106 collection numbers were set by age and sex to align with age and sex distribution strata in Japan,  
107 that is, based on a quota sampling method. Participants were first asked about their consent, age,  
108 and sex. Subsequently, participants were asked the following questions: positive wellbeing  
109 (enjoyment: “Did you experience a feeling of enjoyment yesterday? [yes, no],” emotional  
110 happiness: “Did you experience a feeling of happiness yesterday? [yes, no],” and laughter: “Did you  
111 laugh yesterday? [yes, no]”) (Kahneman and Deaton, 2010; Murakami et al., 2020; Murakami et al.,  
112 2018), subjective feelings of health, psychological distress (Kessler et al., 2003), health history,  
113 including hypertension, diabetes, hyperlipidemia, and cancer, job, marital status, presence/absence  
114 of children, presence/absence of grandchildren, educational background, presence/absence of a  
115 jobless person within the household, and smoking habits. Enjoyment, emotional happiness, and  
116 laughter are positive wellbeing items, and participants were asked to validate emotional happiness  
117 in this study. Survey items other than wellbeing and cancer history were used as covariates to assess  
118 whether there was a cancer-related decline in emotional happiness, in line with a previous study  
119 (Murakami et al., 2018).

120 Our second survey was administered to those aged 20 years and older with a history of cancer in the

121 disease panel between September 1 and 2, 2022, until the pre-designed target collection number of  
122 850 participants was reached. The quota sampling method was not applied to the second survey.  
123 Participants were first asked about their consent and health history, including cancer and age.  
124 Participants were asked to complete the same questionnaire items as in the general panel. In  
125 addition, they were asked about cancer-related survey items (cancer type, history, and stage).

126

### 127 2.3. *LHpLE estimation*

128 The details of the calculation of HpLE and LHpLE have been described in a previous study  
129 (Murakami et al., 2018). Briefly, life expectancy  $e_{x,s}$  for a given age  $x$  and sex  $s$  (males or females)  
130 was calculated using the 2010 Japanese life table (Ministry of Health Labour and Welfare, 2012).  
131  $HpLE_{x,s}$  for a given age  $x$  and sex  $s$  was calculated using age- and sex-specific values of emotional  
132 happiness, as in eqs. 1 and 2 below.

133

$$134 \quad THp_{x,s} = \int_x^{\infty} Hp_{t,s} \times l_{t,s} dt \quad (\text{eq. 1})$$

$$135 \quad HpLE_{x,s} = \frac{THp_{x,s}}{l_{x,s}} \quad (\text{eq. 2})$$

136 where  $Hp_{x,s}$  is emotional happiness at age  $x$  and sex  $s$ , and  $l_x$  is the number of people living at the  
137 start of an interval between age  $x$  and sex  $s$  (of 100,000 born alive).

138

139  $Hp_{x,s}$  is based on the proportion of emotional happiness for each age and sex group (20s, 30s, 40s,

140 50s, and 60s) for the general panel. The values of 20s and 60s were used for those aged 19 years  
141 and younger and for those aged 70 years and older, respectively.

142 LHpLE is calculated for risk exposures that result in decreased emotional happiness or increased  
143 mortality.  $LHpLE_{x,s}$  for a given age  $x$  and sex  $s$  was calculated using the difference in  $HpLE_{x,s}$  with  
144 and without risk exposure. Unless otherwise noted, HpLE and LHpLE refer to their respective  
145 values at age 0. In addition, we calculated the fraction of losses caused by risk exposures to HpLE  
146 ( $Fr_s$ ) using eq. 3 below.

147

148 
$$Fr_s = \frac{LHpLE_s}{HpLE_s + LHpLE_s} \quad (\text{eq.3})$$

149

#### 150 *2.4. Statistical analysis: cancer and emotional happiness*

151 First, we analyzed whether emotional happiness among the general panels differed by age and sex  
152 groups using a two-way analysis of variance of arcsine-transformed data. Subsequently, the validity  
153 of emotional happiness was confirmed by calculating the  $\kappa$  coefficients between emotional  
154 happiness and enjoyment or laughter.

155 We investigated whether cancer incidence decreased emotional happiness using data from the  
156 questionnaires for the general panel and the disease panel with cancer history. We excluded those  
157 who did not provide their health history (445 participants) in this analysis. First, we analyzed the  
158 association between cancer history and emotional happiness for each sex using a chi-square test. As  
159 in previous reports (Arai et al., 2020; Murakami et al., 2021; Murakami et al., 2018), we adjusted



160 for covariates using propensity score matching (Rosenbaum and Rubin, 1983) to examine whether  
161 cancer incidence decreased emotional happiness for each sex. Covariates included subjective  
162 feelings of health (“not good at all, not good” or “good, fair, normal”), psychological distress (“K6  
163  $\leq 12$ ” or “K6  $\geq 13$ ” (Kessler et al., 2003)), and health history, including hypertension, diabetes,  
164 hyperlipidemia (“yes” or “no,” respectively), age (“< 50 years,” “50–59,” or “ $\geq 60$  years”), job  
165 (“company employee, civil servants and nonprofit organization employees, teachers, healthcare  
166 professionals, and other professionals,” “farmer, forestry, fishery workers, and other self-employed,”  
167 or “others”), marital status (“married, living together” “married, living separately” or “other”),  
168 presence or absence of each of children and grandchildren, educational background (“junior or high  
169 school graduate,” “university etc. graduate.” or “do not want to answer”), presence of a jobless  
170 person within the household (“presence,” “absence,” or “do not want to answer”), household  
171 income (“< 3 million yen,” “3–6 million yen” “ $\geq 6$  million yen,” or “do not want to answer”), and  
172 smoking habit (“smokes” or “does not smoke”). We used 1:1 nearest-neighbor matching with a  $\pm$   
173 0.1 caliper and no replacement, as described previously (Murakami et al., 2018). We obtained 502  
174 pairs of males (mean caliper:  $\pm 0.0075$ ) and 339 pairs of females (mean caliper:  $\pm 0.00021$ ).  
175 McNemar’s test was used to examine differences in emotional happiness between those with and  
176 without cancer for each sex after matching.

177 In addition, we used questionnaires administered to the disease panel with cancer history to  
178 examine the associations between emotional happiness and cancer type (lung, colon, stomach,  
179 prostate, breast, or other cancers), history (“< 2 years,” “2–4 years,” or “ $\geq 4$  years”), or stage (“0,”

180 “I,” “II,” “III or more,” or “do not know”), using the chi-square or Fisher’s exact test.

181 All analyses were performed using IBM SPSS Statistics 28 or R statistical software (R  
182 Development Core Team, 2021; Randolph et al., 2014).

183

## 184 2.5. Risk exposures

### 185 2.5.1. Radon

186 Radon exposure in Japan was set at 15 Bq/m<sup>3</sup> based on monitoring data from 1994 to 1996 (Sanada  
187 et al., 1999) and 2007 to 2010 (Suzuki et al., 2010) in a previous report (Nuclear Safety Research  
188 Association, 2020). We used a hazard ratio of 1.15 for lung cancer mortality per 100 Bq/m<sup>3</sup> increase  
189 in radon concentration in the general United States population to establish the dose-response  
190 equation, assuming a linear relationship between dose and response (Turner et al., 2011). The  
191 relative risk was assumed to be independent of age and sex. Lung cancer mortality rates due to  
192 radon by age were calculated using previously reported age-specific lung cancer mortality rates for  
193 males and females in Japan (Statistics of Japan, 2021). We calculated LLE and LHpLE in the  
194 absence of radon by subtracting the mortality rate due to radon from the age-specific mortality rates  
195 in the life table because the Japanese life table (Ministry of Health Labour and Welfare, 2012) is  
196 based on all-cause mortality, including radon risk. We multiplied these values by -1 to estimate the  
197 LLE and LHpLE due to radon exposure.

198 The analysis described in “section 2.4. *Statistical analysis: cancer and emotional happiness*”  
199 demonstrated no significant decrease in emotional happiness due to cancer for males and females,

200 and no significant associations between emotional happiness and cancer type, history, or stage  
201 among patients with cancer (see details in “3.2. Association between cancer and emotional  
202 happiness”). Emotional happiness was significantly higher in males with cancer than those without  
203 cancer; however, we considered it inappropriate to assume that cancer increased emotional  
204 happiness. Therefore, we did not consider the decrease in emotional happiness associated with  
205 cancer due to radon. The same applies to arsenic and PM<sub>2.5</sub> in the following sections.

206

#### 207 2.5.2. Arsenic

208 The arsenic risk was calculated using the carcinogenic slope factor (CSF) or its drinking water  
209 equivalent. The endpoints were skin, liver, and lung cancers. The CSF for skin cancer was  
210 calculated using the median oral slope factor of 1.5 (mg/kg/day)<sup>-1</sup> as given by the United States  
211 Environmental Protection Agency’s Integrated Risk Information System (U.S. Environmental  
212 Protection Agency, 2002). The median CSF for liver and lung cancers were 0.00000306 (µg/L)<sup>-1</sup>  
213 and 0.0000385 (µg/L)<sup>-1</sup>, respectively (Health Canada, 2006). CSF was constant, regardless of age  
214 or sex.

215 The baseline cancer mortality rates used for life table analysis were obtained from a previous report  
216 (Statistics of Japan, 2021). Establishing a fatality rate was crucial for participants with skin cancer  
217 because the CSF for skin cancer (U.S. Environmental Protection Agency, 2002) represents  
218 incidence rates. Here, we used cancer incidence data from the Ministry of Health, Labour, and  
219 Welfare in 2010 (Cancer information service National Cancer Center Japan, 2022a; Hori et al.,

220 2015). We also referred to the cancer incidence data from 2016 (Cancer information service  
221 National Cancer Center Japan, 2022b). These data were used to calculate the ratio of fatality to skin  
222 cancer cases: 0.08 in 2010 and 0.05 in 2016. Subsequently, a conservative estimate of 0.1 was used  
223 in this study.

224 We focused on inorganic arsenic and considered the sum of its oral intake from dietary sources and  
225 drinking water for arsenic exposure in Japan. We adopted 20  $\mu\text{g}/\text{day}$  as the oral intake from dietary  
226 sources because the dietary intake of inorganic arsenic was 19.4  $\mu\text{g}/\text{day}$  in a nationwide market  
227 basket survey in Japan (Akiyama et al., 2020). Drinking tap water was assumed to be the exposure  
228 route of oral intake of drinking water. The maximum arsenic concentration in tap water was 0.1  
229  $\mu\text{g}/\text{L}$ , with 91% of water purification plants having concentrations of 0.01  $\mu\text{g}/\text{L}$  or less (Japan Water  
230 Works Association, 2021). Therefore, the maximum concentration scenario (Scenario A) was set at  
231 0.1  $\mu\text{g}/\text{L}$ , and the average concentration scenario (Scenario B) was set at 0.005  $\mu\text{g}/\text{L}$ , which is half  
232 the quantification limit. The arsenic levels were assumed to be inorganic. The daily drinking water  
233 consumption was assumed to be 2 L/day. Assuming a body weight of 50 kg, the exposure levels  
234 were 0.0008 mg/kg/day (Scenario A) and 0.00042 mg/kg/day (Scenario B).

235 In the life table analysis, we converted CSFs to relative risks (World Health Organization Regional  
236 Office for Europe, 2000). Similar to the method used for radon, LLE and LHpLE without arsenic  
237 were calculated and multiplied by  $-1$  to obtain LLE and LHpLE due to arsenic since the Japanese  
238 life table (Ministry of Health Labour and Welfare, 2012) includes arsenic risk. LLE and LHpLE  
239 were calculated for skin cancer only and all skin, liver, and lung cancers.

240

241 2.5.3.  $PM_{2.5}$

242 An epidemiological study on  $PM_{2.5}$  in Japan reported a significant association between  $PM_{2.5}$   
243 exposure and increased mortality from lung cancer (Katanoda et al., 2011). Therefore, we used lung  
244 cancer as the risk indicator endpoint. We also used data from another large epidemiological study  
245 comprising 1.2 million people with 16 years of follow-up in the United States (Pope III et al., 2002).  
246 The LHpLE calculations using each relative risk are hereafter referred to as scenarios X and Y. The  
247 cutoff values were 15 and 10  $\mu\text{g}/\text{m}^3$  for scenarios X and Y, respectively. The risk increased by a  
248 factor of 1.24 and 1.08, respectively, for each 10  $\mu\text{g}/\text{m}^3$  increase in exposure concentration above  
249 the cutoff value. The relative risk was assumed to be independent of age and sex. The baseline  
250 mortality rates of lung cancer used for life table analysis were obtained from a previous report  
251 (Statistics of Japan, 2021).

252 Exposure concentrations were obtained from the national data for 2012 and 2020 from 596 and  
253 1119 measurement sites, respectively (National Institute for Environmental Studies, 2022). During  
254 this period, a large decrease in  $PM_{2.5}$  concentration was observed in Japan (from 15.2 to 9.59  $\mu\text{g}/\text{m}^3$ ).  
255 In this study, 2012 was chosen because of the small number of measurement sites before 2011,  
256 which was insufficient for calculating representative values of exposure concentrations in Japan.  
257 The risk reductions due to the improvements in air quality were evaluated for these two time points.  
258 A histogram of exposure concentrations at 1  $\mu\text{g}/\text{m}^3$  intervals was created for each prefecture. The  
259 population distribution of exposure concentrations by prefecture was obtained by weighting the

260 population by the frequency of the histograms. Population data by prefecture were obtained from  
261 national data (e-Stat, 2022). This was performed for all 47 prefectures and summed to obtain the  
262 population distribution of exposure concentrations in Japan. The relative risk corresponding to the  
263 exposure concentration was determined. The relative risk for each exposure concentration was  
264 multiplied by the corresponding population and weighted and averaged to obtain a representative  
265 value of the relative risk. In scenario X, the relative risks were 1.0250 and 1.0002 for exposure  
266 concentrations in 2012 and 2020, respectively. The relative risks were 1.0377 and 1.0030,  
267 respectively, for scenario Y. These relative risks were used for life-table analysis.

268 LLE and LHpLE without  $PM_{2.5}$  were calculated and multiplied by  $-1$  to obtain LLE and LHpLE  
269 due to  $PM_{2.5}$  because the Japanese life table (Ministry of Health Labour and Welfare, 2012) includes  
270 life expectancy due to  $PM_{2.5}$  risk.

271

#### 272 2.5.4. Psychological distress

273 LHpLE due to psychological distress was analyzed using K6. In line with a previous report (Kessler  
274 et al., 2003), a K6 score of 13 points or higher was considered a risk factor associated with serious  
275 mental illness. The K6 values for the Japanese population were based on a national survey in 2019  
276 (Ministry of Health Labour and Welfare, 2020). The percentage with a K6 of 13 points or higher  
277 ( $P_{x,s}$ ) was calculated for each age and sex group. We assumed a uniform distribution over the range  
278 of 10–14 points: two-fifths of the people scoring 10–14 would have scored 13–14 since data were  
279 presented on a 5-point scale, as in a previous report (Murakami et al., 2018). We assumed that the

280 percentage with a K6 score of 13 points or higher for participants aged 11 and younger was the  
281 same as that for individuals aged 12–19. This study did not consider the increase in mortality due to  
282 psychological distress, although it can increase mortality (Pratt, 2009). We used  $\Delta Hp_s$  (–0.19 for  
283 males and –0.22 for females), representing the reduced emotional happiness due to psychological  
284 distress (Murakami et al., 2018). LHpLE in the absence of psychological distress was determined  
285 by calculating the emotional happiness  $Hp_{x,s}$  among the population in the absence of psychological  
286 distress using eq. 4, and multiplying this value by –1 to obtain LHpLE due to psychological distress.

287

$$288 \quad Hp_{x,s}' = Hp_{x,s} - \Delta Hp_s \times P_{x,s} \quad (\text{eq.4})$$

289

### 290 **3. Results**

#### 291 *3.1. Emotional happiness by age and sex groups*

292 Emotional happiness by age and sex groups varied, ranging from 0.43 to 0.50 for males in their 20s  
293 to 60s and 0.51 to 0.62 for females in their 20s to 60s (Figure 1). The interactions between age and  
294 sex groups were insignificant ( $P > 0.05$ ), but significant differences were observed between age and  
295 sex groups ( $P < 0.001$  for each). A significant positive association was observed between emotional  
296 happiness and enjoyment or laughter, with  $\kappa$  coefficients of 0.81 and 0.42, respectively ( $P < 0.001$ ).  
297 HpLE calculated using this emotional happiness was 37.5 years and 49.1 years for males and  
298 females, respectively.

299

300 *3.2. Association between cancer and emotional happiness*

301 The chi-square test revealed no significant difference in emotional happiness between females with  
302 and without cancer ( $P > 0.05$ ); however, among males, patients with cancer had significantly higher  
303 emotional happiness than patients without cancer ( $P < 0.001$ ) (Figure 2). No significant difference  
304 in emotional happiness was observed between females with and without cancer ( $P > 0.05$ ), whereas  
305 males with cancer had significantly higher emotional happiness than those without cancer ( $P = 0.01$ ,  
306  $\Delta Hp = 0.078$ ) after adjusting for covariates using propensity score matching.

307 No significant associations were observed between emotional happiness and cancer type (lung,  
308 colorectal, stomach, prostate, breast, and other cancers), history, or stage ( $P > 0.05$ ) (Table 1).

309

310 *3.3. LLE and LHpLE due to environmental carcinogenic chemicals and psychological distress*

311 Table 2 compares the LLE due to environmental carcinogenic chemicals with those in previous  
312 studies conducted in Japan (Gamo et al., 2003; GBD 2019 Risk Factors Collaborators, 2020;  
313 Institute for Health Metrics and Evaluation, 2015). The LLE due to radon calculated in this study  
314 differed from the previous report (Gamo et al., 2003) within about a factor of two, despite  
315 differences in exposure data and dose-response equations. The calculated LLE for arsenic in  
316 scenario B was  $6.9 \times 10^{-4}$  years for skin cancer only and  $5.1 \times 10^{-3}$  years for all endpoints (skin,  
317 liver, and lung cancers). LLE from arsenic-related skin cancer in a previous report (Gamo et al.,  
318 2003) was  $1.6 \times 10^{-3}$  years, and the difference between this study and the previous study was about  
319 a factor of two. LLEs calculated in this study varied greatly in years for  $PM_{2.5}$ , depending on the



320 dose-response equation and the baseline values: for exposure in 2012, LLE was  $1.4 \times 10^{-2}$  years in  
321 the epidemiological study for Japan (Scenario X) (Katanoda et al., 2011) and  $2.2 \times 10^{-2}$  years in the  
322 epidemiological study in the United States (Scenario Y) (Pope III et al., 2002) and 2020 exposure  
323 were  $9.7 \times 10^{-5}$  years and  $1.7 \times 10^{-3}$  years, respectively. In Japan, LLE from lung cancer caused by  
324  $PM_{2.5}$  calculated by the Global Burden Disease 2019 was  $9.6 \times 10^{-4}$  years (GBD 2019 Risk Factors  
325 Collaborators, 2020; Institute for Health Metrics and Evaluation, 2015). The LLEs for scenarios X  
326 and Y were approximately one-tenth and two times higher, respectively, than those previously  
327 reported.

328 Table 3 compares LHpLE due to environmental carcinogenic chemicals with that due to  
329 psychological distress. The average LHpLE for males and females was  $6.4 \times 10^{-3}$  years for radon,  
330  $5.0 \times 10^{-3}$  years (Scenario A, all endpoints) and  $2.6 \times 10^{-3}$  years (Scenario B, all endpoints) for  
331 arsenic,  $7.2 \times 10^{-3}$  years (Scenario X) and  $1.1 \times 10^{-2}$  years (Scenario Y) for  $PM_{2.5}$  exposure in 2012,  
332 and  $4.8 \times 10^{-5}$  years (Scenario X) and  $8.6 \times 10^{-4}$  years (Scenario Y) for  $PM_{2.5}$  exposure in 2020. In  
333 contrast, LHpLE due to psychological distress was  $9.7 \times 10^{-1}$  years. *Fr* was  $1.5 \times 10^{-4}$ ,  $1.2 \times 10^{-4}$ ,  
334  $6.1 \times 10^{-5}$ ,  $1.7 \times 10^{-4}$ ,  $2.5 \times 10^{-4}$ ,  $1.1 \times 10^{-6}$ ,  $2.0 \times 10^{-5}$ , and  $2.2 \times 10^{-2}$ , respectively.

335

#### 336 **4. Discussion**

337 In this study, we conducted questionnaire surveys among a general panel and disease panel with  
338 cancer history to investigate emotional happiness based on age and sex and analyzed the  
339 relationship between cancer incidence and emotional happiness. In addition, we compared LHpLE

340 among carcinogenic chemicals, such as radon, arsenic, and PM<sub>2.5</sub>, and psychological distress in  
341 Japan.

342 Emotional happiness was significantly higher in females than in males and was positively  
343 associated with enjoyment and laughter, which are positive wellbeing items similar to emotional  
344 wellbeing. These results are consistent with those of a previous study (Murakami et al., 2018).  
345 Emotional happiness scores ranged from 0.43–0.50 for males in their 20s to 60s and 0.51–0.62 for  
346 females in their 20s to 60s, which was slightly lower than those reported in the 2015 study (0.47–  
347 0.58 for males and 0.65–0.68 for females) (Murakami et al., 2018) and the 2016 study (0.52–0.62  
348 for males) (Arai et al., 2020) conducted in Japan. Emotional happiness might reduce during the  
349 coronavirus disease 2019 outbreak, and the HpLE obtained in this study was possibly lower than it  
350 would be in the absence of the outbreak.

351 In this study, regardless of propensity score matching, emotional happiness was significantly higher  
352 in males with cancer than those without cancer. However, emotional happiness between females  
353 with cancer and those without cancer did not differ significantly. One possible reason for the  
354 increased emotional happiness among males with cancer is that their values might have changed  
355 following their cancer diagnosis. According to socioemotional selectivity theory, the perception that  
356 “time is finite” alters life goals, cognitions, and emotions, leading to a greater emphasis on  
357 emotional satisfaction (Carstensen, 2006). Cancer might enhance emotional happiness by  
358 reinforcing the perception of time as finite. However, we considered it inappropriate to conclude  
359 that cancer incidence increased emotional happiness when LHpLE was calculated. We did not

360 consider the decrease or increase in emotional happiness due to cancer incidence when calculating  
361 LHpLE because no significant associations were observed between emotional happiness and cancer  
362 type, history, or stage.

363 In this study, as a preliminary step in discussing the magnitude of LHpLE for carcinogenic  
364 chemicals, we compared the LLE values with those reported in previous studies (Gamo et al., 2003;  
365 GBD 2019 Risk Factors Collaborators, 2020; Institute for Health Metrics and Evaluation, 2015).  
366 Regardless of the differences in exposure doses, dose-response equations, and life tables used, the  
367 differences from the previous study (Gamo et al., 2003) for radon and arsenic (skin cancer) were  
368 within a factor of two. However, when liver and lung cancers, which were not included in the  
369 previous study (Gamo et al., 2003), were considered for arsenic, the LLE was 7.5 times greater than  
370 that for skin cancer alone. Regarding PM<sub>2.5</sub>, owing to differences in baseline and dose-response  
371 equations from the different epidemiological studies used (Katanoda et al., 2011; Pope III et al.,  
372 2002), the LLE at 2020 exposure levels was  $9.7 \times 10^{-5}$  years (Scenario X) and  $1.7 \times 10^{-3}$  years  
373 (Scenario Y) in this study, yielding an 18-fold difference between the scenarios. In contrast, the  
374 LLE from lung cancer due to PM<sub>2.5</sub> exposure in a previous study (GBD 2019 Risk Factors  
375 Collaborators, 2020; Institute for Health Metrics and Evaluation, 2015) was  $9.6 \times 10^{-4}$  years. These  
376 findings suggest that appropriate dose-response equations and baseline settings are important in risk  
377 assessments, especially in Japan, where atmospheric PM<sub>2.5</sub> concentrations have been declining  
378 (National Institute for Environmental Studies, 2022). In general, it is desirable to use  
379 epidemiological data from the target region. However, scenario X is based on an epidemiological

380 study conducted in Japan (Katanoda et al., 2011) with 63,520 participants and a study period of 10  
381 years, which were smaller than those in the epidemiological study in the United States for scenario  
382 Y (1.2 million participants, 16 years) (Pope III et al., 2002). This may have resulted in a higher  
383 calculated baseline value owing to weak statistical power. Comparing the value from the 2019  
384 Global Burden Disease, which had a dose-response equation and baseline value set for various  
385 countries (GBD 2019 Risk Factors Collaborators, 2020; Institute for Health Metrics and Evaluation,  
386 2015), scenario X possibly underestimated the risk of PM<sub>2.5</sub>. Therefore, we refer to the values of  
387 scenario Y concerning the LHpLE for PM<sub>2.5</sub>.

388 The average LHpLE for males and females were  $6.4 \times 10^{-3}$  years for radon and  $2.6 \times 10^{-3}$  years for  
389 arsenic (Scenario B, all endpoints),  $1.1 \times 10^{-2}$  for PM<sub>2.5</sub> at 2012 exposure levels, and  $8.6 \times 10^{-4}$  for  
390 PM<sub>2.5</sub> at 2020 exposure levels (Scenario Y). LHpLE for PM<sub>2.5</sub> decreased significantly from 2012 to  
391 2020. Fr was  $1.5 \times 10^{-4}$ ,  $6.1 \times 10^{-5}$ ,  $2.5 \times 10^{-4}$ , and  $2.0 \times 10^{-5}$ , respectively. LHpLE due to radon,  
392 arsenic (Scenario B), and PM<sub>2.5</sub> in 2012 (Scenario Y) were comparable to or larger than those due to  
393 radiation exposure after the Fukushima Daiichi Nuclear Power Station accident ( $5 \times 10^{-3}$  for 40-  
394 year-old males and females) (Murakami et al., 2018). Given that the Fr value exceeded  $10^{-5}$ ,  
395 environmental policies must reduce the risk of these carcinogenic chemicals, including PM<sub>2.5</sub>,  
396 whose concentration in the air has improved in recent years (National Institute for Environmental  
397 Studies, 2022). In this study, PM<sub>2.5</sub> calculation only considered the risk associated with lung cancer;  
398 the LLE from lung cancer due to PM<sub>2.5</sub> by the 2019 Global Burden Disease was equivalent to 22%  
399 of LLE ( $4.4 \times 10^{-3}$  years) and 16% of DALYs per capita ( $6.0 \times 10^{-3}$  years) for all endpoints related

400 to ischemic heart disease, stroke, chronic obstructive pulmonary disease, lung cancer, acute lower  
401 respiratory infection, type II diabetes, and adverse birth outcomes (GBD 2019 Risk Factors  
402 Collaborators, 2020; Institute for Health Metrics and Evaluation, 2015). The LHpLE due to PM<sub>2.5</sub>  
403 could be nearly an order of magnitude higher than that calculated in this study if various endpoints  
404 other than lung cancer were included since lung cancer partly contributes to all endpoints in the  
405 2019 Global Burden Disease.

406 The LHpLE associated with environmental carcinogenic chemicals were approximately two to four  
407 orders of magnitude lower than that due to psychological distress. However, this does not mean that  
408 policies targeting psychological distress should be prioritized over carcinogen risk management. For  
409 example, assessing the cost-effectiveness of the measures for each risk exposure is essential for  
410 policymaking. In addition, the LHpLE used in this study can evaluate the effectiveness of  
411 mitigation measures for different risks in various fields in the future. The LHpLE indicator can be  
412 beneficial in how risk-reduction decisions are made and how the effects are achieved by comparing  
413 the magnitude and cost-effectiveness of these various risks.

414 This study had several limitations. First, this study used online surveys to calculate the values of  
415 emotional happiness for the general population and patients with cancer. The target population may  
416 differ from that of Japan as a whole. However, our online surveys had the advantage of reducing  
417 bias because participants were incentivized to participate by being awarded points, even if they  
418 were uninterested in the survey content. In addition, the participants in this study were recruited to  
419 match the age and sex distributions of the whole country to reduce the impact of selection bias on

420 emotional happiness. However, this was applied only to the general panel and not to the cancer  
421 panel, which had a limited sample size. Furthermore, to discuss changes in emotional happiness due  
422 to cancer, the participants were matched for various covariates, such as educational background,  
423 annual income, and health history, to reduce the impact of selection bias. Second, we substituted  
424 values for emotional happiness for those under 20 and over 70 years of age with values for those in  
425 their 20s and 60s, respectively. However, as shown in the sensitivity analysis of a previous study  
426 (Murakami et al., 2018), the impact of this assumption on LHpLE can be negligibly small. Third,  
427 this study did not consider the increase in mortality due to psychological distress. Similarly, we did  
428 not consider the risk for those with moderate psychological distress between 5 and 12 points on the  
429 K6 scale. Thus, the risk of psychological distress may have been underestimated. Fourth, as noted  
430 above, there were large differences in the risk of PM<sub>2.5</sub> depending on the dose-response equation,  
431 baseline value, and endpoints applied. Updated findings based on sophisticated, large-scale cohort  
432 studies in the target regions are required to reduce the uncertainty in the PM<sub>2.5</sub> risk assessment.  
433 Nevertheless, this study emphasized the importance of reducing PM<sub>2.5</sub> risk.

434

## 435 **5. Conclusions**

436 This study compared the risk of radon, arsenic, and PM<sub>2.5</sub> with that of psychological distress in  
437 Japan using the LHpLE indicator. The findings of this study are as follows.

- 438 ● No significant reduction was observed in emotional happiness owing to cancer incidence, and  
439 no associations were observed between emotional happiness and cancer type, history, or stage.

440 ● LHpLE was  $6.4 \times 10^{-3}$  years for radon,  $2.6 \times 10^{-3}$  years for arsenic (scenario B),  $1.1 \times 10^{-2}$   
441 years for PM<sub>2.5</sub> at 2012 exposure levels (Scenario Y), and  $8.6 \times 10^{-4}$  years at 2020 exposure  
442 level (Scenario Y). Fr exceeded  $10^{-5}$ , suggesting that risk reduction for these chemicals is  
443 important in environmental policies.

444 ● LLE and LHpLE for PM<sub>2.5</sub> at 2020 exposure levels differed greatly depending on the dose-  
445 response equation and baseline values. This warrants further research to obtain updated  
446 knowledge based on sophisticated, large-scale cohort studies in the target regions under low  
447 atmospheric PM<sub>2.5</sub> concentrations, such as in Japan, to reduce the uncertainty of PM<sub>2.5</sub> risk  
448 assessment.

449 ● LHpLE due to radon, arsenic, and PM<sub>2.5</sub> were two to four orders of magnitude lower than that  
450 due to psychological distress.

451 ● LHpLE allowed the comparison of risks in various fields, including environmental chemicals  
452 and psychological distress, highlighting the strength of using the LHpLE indicator to compare  
453 the magnitude of risk and cost-effectiveness for various future risk exposures, thereby  
454 contributing to effective risk reduction decision-making.

455

## 456 **Acknowledgements**

457 This work was supported by JSPS KAKENHI (grant number JP20H04354) and “The Nippon  
458 Foundation - Osaka University Project for Infectious Disease Prevention.”

459

460 **References**

- 461 Akiyama, H., Tsutsumi, T., Suzuki, Y., Inoue, K., Oka, A., Uneyama, C., 2020. *Shokuhin wo kaisita*  
462 *dioxin rui nado yugai bussitu sesshuryou no hyouka to sono shuhou kaihatu no tameno*  
463 *kenkyuu* in "Ministry of Health, Labour and Welfare Grants System". [https://mhlw-](https://mhlw-grants.niph.go.jp/project/28122)  
464 [grants.niph.go.jp/project/28122](https://mhlw-grants.niph.go.jp/project/28122) (accessed February 7, 2023). (in Japanese)
- 465 Arai, R., Kiguchi, M., Murakami, M., 2020. A quantitative estimation of the effects of measures to  
466 counter climate change on well-being: Focus on non-use of air conditioners as a mitigation  
467 measure in Japan. *Sustain.* 12, 1-18.
- 468 Bok, D., 2010. *The politics of happiness: What government can learn from the new research on*  
469 *well-being*: Princeton University Press.
- 470 Cancer information service National Cancer Center Japan, 2022a. Cancer statistics (Monitoring of  
471 cancer incidence in Japan (MCIJ)). [https://ganjoho.jp/reg\\_stat/statistics/data/dl/en.html](https://ganjoho.jp/reg_stat/statistics/data/dl/en.html)  
472 (accessed February 7, 2023).
- 473 Cancer information service National Cancer Center Japan, 2022b. Cancer statistics (National  
474 Cancer Registry Ministry of Health Labour and Welfare).  
475 [https://ganjoho.jp/reg\\_stat/statistics/data/dl/en.html](https://ganjoho.jp/reg_stat/statistics/data/dl/en.html) (accessed February 7, 2023).
- 476 Carstensen, L.L., 2006. The influence of a sense of time on human development. *Science.* 312,  
477 1913-1915.
- 478 Cohen, B.L., Lee, I.S., 1979. A catalog of risks. *Health Phys.* 36, 707-22.
- 479 e-Stat, 2022. *Jumin kihon daityo ni motoduku jinkou jinkoudoutai oyobi setaisuu tyousa.*



480 <https://www.e-stat.go.jp/stat->  
481 [search/files?page=1&layout=datalist&toukei=00200241&tstat=000001039591&cycle=7&tclass1=000001039601&tclass2val=0](https://www.e-stat.go.jp/stat-search/files?page=1&layout=datalist&toukei=00200241&tstat=000001039591&cycle=7&tclass1=000001039601&tclass2val=0) (accessed February 7, 2023). (in Japanese)  
482  
483 Fisher, J.C., Irvine, K.N., Bicknell, J.E., Hayes, W.M., Fernandes, D., Mistry, J., et al., 2021.  
484 Perceived biodiversity, sound, naturalness and safety enhance the restorative quality and  
485 wellbeing benefits of green and blue space in a neotropical city. *Sci. Total Environ.* 755,  
486 143095.  
487 Gamo, M., Oka, T., Nakanishi, J., 2003. Ranking the risks of 12 major environmental pollutants that  
488 occur in Japan. *Chemosphere.* 53, 277-284.  
489 GBD 2019 Risk Factors Collaborators, 2020. Global burden of 87 risk factors in 204 countries and  
490 territories, 1990-2019: A systematic analysis for the Global Burden of Disease Study 2019.  
491 *Lancet.* 396, 1223-1249.  
492 Graunt, J., 1662. *Natural and political observations made upon the bills of mortality.* London.  
493 Health Canada, 2006. Guidelines for Canadian drinking water quality: Guideline technical  
494 document arsenic. [https://healthycanadians.gc.ca/publications/healthy-living-vie-](https://healthycanadians.gc.ca/publications/healthy-living-vie-saine/water-arsenic-eau/alt/water-arsenic-eau-eng.pdf)  
495 [saine/water-arsenic-eau/alt/water-arsenic-eau-eng.pdf](https://healthycanadians.gc.ca/publications/healthy-living-vie-saine/water-arsenic-eau/alt/water-arsenic-eau-eng.pdf) (accessed February 7, 2023).  
496 Hori, M., Matsuda, T., Shibata, A., Katanoda, K., Sobue, T., Nishimoto, H., 2015. Cancer incidence  
497 and incidence rates in Japan in 2009: A study of 32 population-based cancer registries for  
498 the Monitoring of Cancer Incidence in Japan (MCIJ) project. *Jpn. J. Clin. Oncol.* 45, 884-91.  
499 Institute for Health Metrics and Evaluation, 2015. *GBD Compare.* Seattle, Washington: Institute for

500 Health Metrics and Evaluation, University of Washington. <http://vizhub.healthdata.org/gbd->  
501 compare (accessed February 2, 2023).

502 Japan Water Works Association, 2021. *Suidou Toukei* fiscal year 2019. Tokyo: Japan Water Works  
503 Association. (in Japanese)

504 Johnson, R., Jenkinson, D., Stinton, C., Taylor-Phillips, S., Madan, J., Stewart-Brown, S., et al.,  
505 2016. Where's WALY?: A proof of concept study of the 'wellbeing adjusted life year' using  
506 secondary analysis of cross-sectional survey data. *Health Qual. Life Outcomes.* 14, 126.

507 Kahneman, D., Deaton, A., 2010. High income improves evaluation of life but not emotional well-  
508 being. *P. Natl. Acad. Sci. USA.* 107, 16489-93.

509 Katanoda, K., Sobue, T., Satoh, H., Tajima, K., Suzuki, T., Nakatsuka, H., et al., 2011. An  
510 association between long-term exposure to ambient air pollution and mortality from lung  
511 cancer and respiratory diseases in Japan. *J. Epidemiol.* 21, 132-143.

512 Kessler, R.C., Barker, P.R., Colpe, L.J., Epstein, J.F., Gfroerer, J.C., Hiripi, E., et al., 2003.  
513 Screening for serious mental illness in the general population. *Arch. Gen. Psychiatry.* 60,  
514 184-9.

515 Mantel, N., Bryan, W.R., 1961. "Safety" testing of carcinogenic agents. *J. Natl. Cancer Inst.* 27,  
516 455-470.

517 Mashiko, M., 1989. Intake of different chemical species of dietary arsenic by Japanese, and their  
518 blood and urinary arsenic levels. *The St. Marianna Med. J.* 17, 305-312. (in Japanese)

519 Ministry of Health Labour and Welfare, 2012. The 21st life tables.

520 <http://www.mhlw.go.jp/toukei/saikin/hw/life/21th/index.html> (accessed 18 Apr. 2017). (in  
521 Japanese)

522 Ministry of Health Labour and Welfare, 2020. Summary report of comprehensive survey of living  
523 conditions 2019. <https://www.mhlw.go.jp/english/database/db-hss/cslc-report2019.html>  
524 (accessed February 3, 2023).

525 Murakami, M., Takebayashi, Y., Ono, K., Kubota, A., Tsubokura, M., 2020. The decision to return  
526 home and wellbeing after the Fukushima disaster. *Int. J. Disaster Risk Reduction*. 47,  
527 101538.

528 Murakami, M., Takebayashi, Y., Ono, K., Tsubokura, M., 2021. Risk trade-off analysis of returning  
529 home and radiation exposure after a nuclear disaster using a happy life expectancy indicator.  
530 *J. Radiat. Res.* 62, i101-i106.

531 Murakami, M., Tsubokura, M., Ono, K., Maeda, M., 2018. New "loss of happy life expectancy"  
532 indicator and its use in risk comparison after Fukushima disaster. *Sci. Total Environ.* 615,  
533 1527-1534.

534 Murray, C.J., Lopez, A.D., Jamison, D.T., 1994. The global burden of disease in 1990: Summary  
535 results, sensitivity analysis and future directions. *Bull. World Health Organ.* 72, 495-509.

536 National Institute for Environmental Studies, 2022. *Taiki osen jouji kanshi data*.  
537 <https://tenbou.nies.go.jp/download/> (accessed February 7, 2023). (in Japanese)

538 National Research Council, 1999. Committee on the Biological Effects of Ionizing Radiation VI  
539 (BEIR-VI), Health effects of exposure to radon. Washington DC: National Academy Press.

- 540 Nuclear Safety Research Association, 2020. *Seikatu kankyo houshasen (kokumin senryo no santei)*  
541 *dai 3 han*. Tokyo: Nuclear Safety Research Association.
- 542 Pope III, C.A., Burnett, R.T., Thun, M.J., Calle, E.E., Krewski, D., Ito, K., et al., 2002. Lung cancer,  
543 cardiopulmonary mortality, and long-term exposure to fine particulate air pollution. *JAMA*.  
544 287, 1132-1141.
- 545 Pratt, L.A., 2009. Serious psychological distress, as measured by the K6, and mortality. *Ann.*  
546 *Epidemiol.* 19, 202-9.
- 547 R Development Core Team, 2021. R 4.2.0. R: A language and environment for statistical computing.  
548 R Foundation for Statistical Computing. Vienna, Austria.
- 549 Randolph, J.J., Falbe, K., Manuel, A.K., Balloun, J.L., 2014. A step-by-step guide to propensity  
550 score matching in R. *Pract. Assess. Res. Evaluation.* 19, 18.
- 551 Rosenbaum, P.R., Rubin, D.B., 1983. The central role of the propensity score in observational  
552 studies for causal effects. *Biometrika.* 70, 41-55.
- 553 Sanada, T., Fujimoto, K., Miyano, K., Doi, M., Tokonami, S., Uesugi, M., et al., 1999.  
554 Measurement of nationwide indoor Rn concentration in Japan. *J. Environ. Radioactiv.* 45,  
555 129-137.
- 556 Sanderson, W., Striessnig, E., Schopp, W., Amann, M., 2013. Effects on well-being of investing in  
557 cleaner air in India. *Environ. Sci. Technol.* 47, 13222-9.
- 558 Statistics of Japan, 2021. Death rates (per 100,000 population) by sex, age and causes (the  
559 condensedlist of causes of death for Japan): Japan, 2010. <http://www.e>

560 [stat.go.jp/SG1/estat/ListE.do?lid=000001101825](http://stat.go.jp/SG1/estat/ListE.do?lid=000001101825) (accessed February 2, 2023).

561 Suzuki, G., Yamaguchi, I., Ogata, H., Sugiyama, H., Yonehara, H., Kasagi, F., et al., 2010. A nation-  
562 wide survey on indoor radon from 2007 to 2010 in Japan. *J. Radiat. Res.* 51, 683-689.

563 Turner, M.C., Krewski, D., Chen, Y., Pope, C.A., 3rd, Gapstur, S., Thun, M.J., 2011. Radon and  
564 lung cancer in the American Cancer Society cohort. *Cancer Epidemiol. Biomarkers Prev.* 20,  
565 438-48.

566 U.S. Environmental Protection Agency, 2002. Arsenic, inorganic; CASRN 7440-38-2.  
567 [https://iris.epa.gov/static/pdfs/0278\\_summary.pdf](https://iris.epa.gov/static/pdfs/0278_summary.pdf) (accessed February 7, 2023).

568 World Health Organization Regional Office for Europe, 2000. Air quality guidelines for Europe.  
569 Second Edition Chapter 2 Criteria used in establishing guideline values.  
570 [https://www.euro.who.int/\\_\\_data/assets/pdf\\_file/0005/74732/E71922.pdf](https://www.euro.who.int/__data/assets/pdf_file/0005/74732/E71922.pdf) (accessed  
571 February 7, 2023).

572 Zeckhauser, R., Shepard, D., 1976. Where now for saving lives? *Law Contemp. Probl.* 40, 5-45.

573

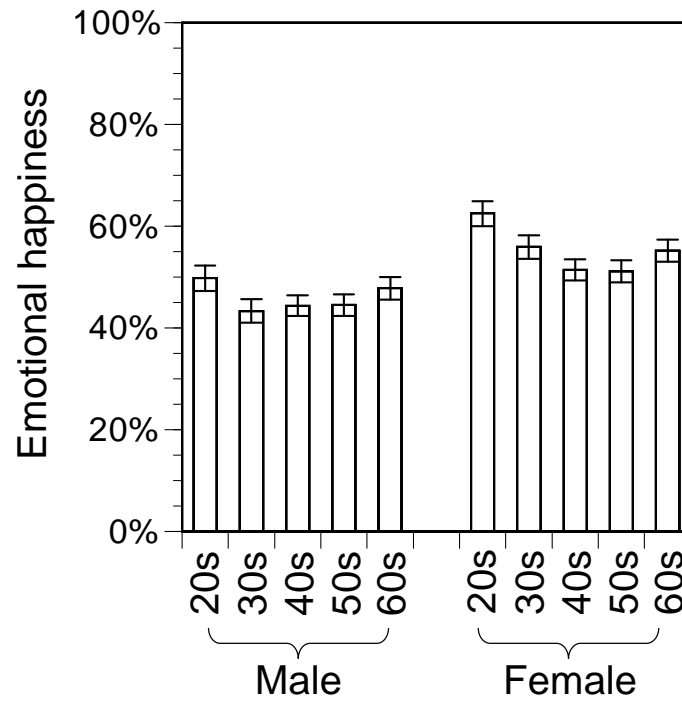

574

575 Figure 1. Emotional happiness in the general panel by age and sex groups. The error bar represents

576 a standard error. Two-way analysis of variance of arcsine-transformed data demonstrated no

577 significant interaction between age and sex ( $P > 0.05$ ), but significant differences were observed

578 between age groups ( $P < 0.001$ ) and sex ( $P < 0.001$ ).

579

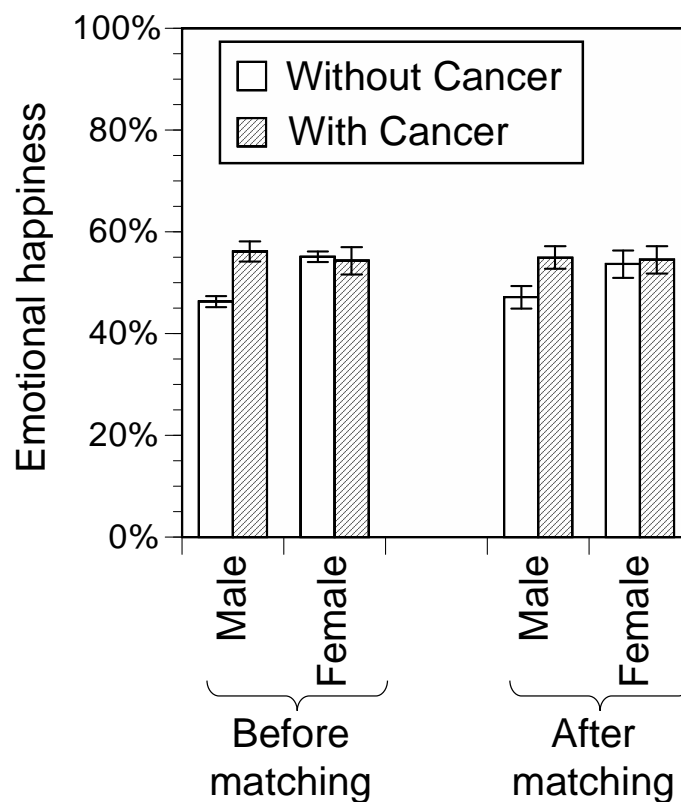

580

581 Figure 2. Comparisons of emotional happiness between the absence and presence of cancer before  
582 and after propensity score matching. The error bar represents a standard error. The chi-square test  
583 before matching and the McNemar test after matching demonstrated insignificant differences in  
584 emotional happiness between the absence and presence of cancer in females ( $P > 0.05$ ). These tests  
585 showed that emotional happiness in males with cancer was significantly higher than in those  
586 without cancer ( $P < 0.001$  before matching;  $P = 0.01$  after matching). For matching, covariates were  
587 adjusted for subjective feelings of health, health history (hypertension, diabetes, and  
588 hyperlipidemia), psychological distress, age, job, marriage, child, grandchild, educational  
589 background, presence of a jobless person within the household, household income, and smoking  
590 habit.

591 Table 1. Associations between emotional happiness and attributes of patients with cancer.

|                           | Male                    |                         | <i>P</i> | Female                  |                         | <i>P</i> |
|---------------------------|-------------------------|-------------------------|----------|-------------------------|-------------------------|----------|
|                           | Emotional happiness (+) | Emotional happiness (-) |          | Emotional happiness (+) | Emotional happiness (-) |          |
| Lung cancer (+)           | 41 (55%)                | 34 (45%)                | 0.61     | 5 (36%)                 | 9 (64%)                 | 0.14     |
| Lung cancer (-)           | 296 (58%)               | 216 (42%)               |          | 138 (56%)               | 108 (44%)               |          |
| Colorectal cancer (+)     | 78 (57%)                | 60 (43%)                | 0.81     | 15 (52%)                | 14 (48%)                | 0.71     |
| Colorectal cancer (-)     | 259 (58%)               | 190 (42%)               |          | 128 (55%)               | 103 (45%)               |          |
| Stomach cancer (+)        | 57 (56%)                | 45 (44%)                | 0.73     | 4 (57%)                 | 3 (43%)                 | 1.00     |
| Stomach cancer (-)        | 280 (58%)               | 205 (42%)               |          | 139 (55%)               | 114 (45%)               |          |
| Prostate cancer (+)       | 76 (57%)                | 58 (43%)                | 0.85     | 0 (-)                   | 0 (-)                   | -        |
| Prostate cancer (-)       | 261 (58%)               | 192 (42%)               |          | 143 (55%)               | 117 (45%)               |          |
| Breast cancer (+)         | 3 (38%)                 | 5 (63%)                 | 0.30     | 70 (55%)                | 58 (45%)                | 0.92     |
| Breast cancer (-)         | 334 (58%)               | 245 (42%)               |          | 73 (55%)                | 59 (45%)                |          |
| Other cancer (+)          | 157 (58%)               | 115 (42%)               | 0.89     | 59 (55%)                | 48 (45%)                | 0.97     |
| Other cancer (-)          | 180 (57%)               | 135 (43%)               |          | 84 (55%)                | 69 (45%)                |          |
| Cancer history: < 2 years | 42 (49%)                | 44 (51%)                | 0.09     | 17 (50%)                | 17 (50%)                | 0.48     |
| Cancer history: 2–4 years | 142 (62%)               | 87 (38%)                |          | 50 (60%)                | 33 (40%)                |          |
| Cancer history: ≥ 4 years | 153 (56%)               | 120 (44%)               |          | 76 (53%)                | 67 (47%)                |          |
| Stage 0                   | 53 (62%)                | 32 (38%)                | 0.85     | 30 (68%)                | 14 (32%)                | 0.13     |
| Stage I                   | 93 (56%)                | 73 (44%)                |          | 49 (58%)                | 35 (42%)                |          |
| Stage II                  | 67 (57%)                | 51 (43%)                |          | 28 (53%)                | 25 (47%)                |          |
| Stage III or more         | 70 (56%)                | 55 (44%)                |          | 22 (44%)                | 28 (56%)                |          |
| Do not know               | 53 (60%)                | 35 (40%)                |          | 12 (44%)                | 15 (56%)                |          |

592

593



594 Table 2. Loss of life expectancy (LLE) due to radon, arsenic, and PM<sub>2.5</sub> in Japan and comparison  
 595 with previous studies [years].

596

|                                        | Male                 | Female               | Male and female      | The previous studies (male and female)                                                                                           |
|----------------------------------------|----------------------|----------------------|----------------------|----------------------------------------------------------------------------------------------------------------------------------|
| Radon                                  | $1.8 \times 10^{-2}$ | $8.0 \times 10^{-3}$ | $1.3 \times 10^{-2}$ | $2.7 \times 10^{-2}$ (Gamo et al., 2003) <sup>a</sup>                                                                            |
| Arsenic (Scenario A)                   | $9.7 \times 10^{-3}$ | $9.9 \times 10^{-3}$ | $9.8 \times 10^{-3}$ | -                                                                                                                                |
| Arsenic (Scenario B)                   | $5.1 \times 10^{-3}$ | $5.2 \times 10^{-3}$ | $5.1 \times 10^{-3}$ | -                                                                                                                                |
| Arsenic (Scenario A, skin cancer only) | $1.3 \times 10^{-3}$ | $1.3 \times 10^{-3}$ | $1.3 \times 10^{-3}$ | -                                                                                                                                |
| Arsenic (Scenario B, skin cancer only) | $7.0 \times 10^{-4}$ | $6.7 \times 10^{-4}$ | $6.9 \times 10^{-4}$ | $1.6 \times 10^{-3}$ (Gamo et al., 2003) <sup>b</sup>                                                                            |
| PM <sub>2.5</sub> (Scenario X, 2012)   | $2.0 \times 10^{-2}$ | $8.8 \times 10^{-3}$ | $1.4 \times 10^{-2}$ | -                                                                                                                                |
| PM <sub>2.5</sub> (Scenario Y, 2012)   | $3.0 \times 10^{-2}$ | $1.3 \times 10^{-2}$ | $2.2 \times 10^{-2}$ | -                                                                                                                                |
| PM <sub>2.5</sub> (Scenario X, 2020)   | $1.3 \times 10^{-4}$ | $6.0 \times 10^{-5}$ | $9.7 \times 10^{-5}$ | $9.6 \times 10^{-4}$ (GBD 2019 Risk Factors Collaborators, 2020; Institute for Health Metrics and Evaluation, 2015) <sup>c</sup> |
| PM <sub>2.5</sub> (Scenario Y, 2020)   | $2.4 \times 10^{-3}$ | $1.1 \times 10^{-3}$ | $1.7 \times 10^{-3}$ |                                                                                                                                  |

597 Scenario A: maximum concentration of arsenic in drinking water. Scenario B: average  
 598 concentration of arsenic in drinking water. Scenario X: risk assessment based on a Japanese cohort  
 599 study (Katanoda et al., 2011). Scenario Y: risk assessment based on a United States cohort study  
 600 (Pope III et al., 2002).

601 <sup>a</sup> This value was based on monitoring data in 1993–1996 (Sanada et al., 1999) and a dose-response  
 602 equation model (National Research Council, 1999).

603 <sup>b</sup> This value was based on food duplicate monitoring data (Mashiko, 1989), a dose-response  
 604 equation model for skin cancer (U.S. Environmental Protection Agency, 2002) and skin cancer  
 605 fatality rates.

606 <sup>c</sup> This value was derived from estimates of years of life lost per population in 2019 within the  
607 calculation of lung cancer disease burden. This value was equivalent to 22% of LLE ( $4.4 \times 10^{-3}$   
608 years) and 16% of disability-adjusted life years (DALYs) per capita ( $6.0 \times 10^{-3}$  years) for endpoints  
609 related to ischemic heart disease, stroke, chronic obstructive pulmonary disease, lung cancer, acute  
610 lower respiratory infection, type II diabetes, and adverse birth outcomes.

611

612

613

614 Table 3. Comparison of the loss of happy life expectancy (LHpLE) among radon, arsenic, PM<sub>2.5</sub>,  
 615 and psychological distress in Japan [years].

616

|                                        | Male                                          | Female                                        | Male and female                               |
|----------------------------------------|-----------------------------------------------|-----------------------------------------------|-----------------------------------------------|
| Radon                                  | $8.5 \times 10^{-3}$ ( $2.3 \times 10^{-4}$ ) | $4.4 \times 10^{-3}$ ( $8.9 \times 10^{-5}$ ) | $6.4 \times 10^{-3}$ ( $1.5 \times 10^{-4}$ ) |
| Arsenic (Scenario A)                   | $4.6 \times 10^{-3}$ ( $1.2 \times 10^{-4}$ ) | $5.4 \times 10^{-3}$ ( $1.1 \times 10^{-4}$ ) | $5.0 \times 10^{-3}$ ( $1.2 \times 10^{-4}$ ) |
| Arsenic (Scenario B)                   | $2.4 \times 10^{-3}$ ( $6.5 \times 10^{-5}$ ) | $2.8 \times 10^{-3}$ ( $5.8 \times 10^{-5}$ ) | $2.6 \times 10^{-3}$ ( $6.1 \times 10^{-5}$ ) |
| Arsenic (Scenario A, skin cancer only) | $6.3 \times 10^{-4}$ ( $1.7 \times 10^{-5}$ ) | $7.0 \times 10^{-4}$ ( $1.4 \times 10^{-5}$ ) | $6.7 \times 10^{-4}$ ( $1.5 \times 10^{-5}$ ) |
| Arsenic (Scenario B, skin cancer only) | $3.3 \times 10^{-4}$ ( $8.9 \times 10^{-6}$ ) | $3.7 \times 10^{-4}$ ( $7.5 \times 10^{-6}$ ) | $3.5 \times 10^{-4}$ ( $8.1 \times 10^{-6}$ ) |
| PM <sub>2.5</sub> (Scenario X, 2012)   | $9.5 \times 10^{-3}$ ( $2.5 \times 10^{-4}$ ) | $4.9 \times 10^{-3}$ ( $9.9 \times 10^{-5}$ ) | $7.2 \times 10^{-3}$ ( $1.7 \times 10^{-4}$ ) |
| PM <sub>2.5</sub> (Scenario Y, 2012)   | $1.4 \times 10^{-2}$ ( $3.8 \times 10^{-4}$ ) | $7.3 \times 10^{-3}$ ( $1.5 \times 10^{-4}$ ) | $1.1 \times 10^{-2}$ ( $2.5 \times 10^{-4}$ ) |
| PM <sub>2.5</sub> (Scenario X, 2020)   | $6.4 \times 10^{-5}$ ( $1.7 \times 10^{-6}$ ) | $3.3 \times 10^{-5}$ ( $6.7 \times 10^{-7}$ ) | $4.8 \times 10^{-5}$ ( $1.1 \times 10^{-6}$ ) |
| PM <sub>2.5</sub> (Scenario Y, 2020)   | $1.1 \times 10^{-3}$ ( $3.0 \times 10^{-5}$ ) | $5.8 \times 10^{-4}$ ( $1.2 \times 10^{-5}$ ) | $8.6 \times 10^{-4}$ ( $2.0 \times 10^{-5}$ ) |
| Psychological distress                 | $7.5 \times 10^{-1}$ ( $2.0 \times 10^{-2}$ ) | $1.2 \times 10^0$ ( $2.4 \times 10^{-2}$ )    | $9.7 \times 10^{-1}$ ( $2.2 \times 10^{-2}$ ) |

617 The values in parentheses represent the fraction of losses caused by risk exposure to HpLE.

618 Scenario A: maximum concentration of arsenic in drinking water. Scenario B: average

619 concentration of arsenic in drinking water. Scenario X: risk assessment based on a Japanese cohort

620 study (Katanoda et al., 2011). Scenario Y: risk assessment based on a United States cohort study

621 (Pope III et al., 2002).

622

623

624
